# Supplementary material for: Microglia complement signaling promotes neuronal elimination and normal brain functional connectivity
Source: bioRxiv or medRxiv preprint supplement (doi:10.1101/2021.03.31.437118), 2021-04-02
Supplement: Supplementary file [file media-1.pdf]

## 24 **SI Materials & Methods**

### 25 *Animals*

26 All mice tested were obtained by internal colonies from the European Molecular biology  
27 laboratory. Mice were maintained in temperature and humidity-controlled condition with  
28 food and water provided *ad libitum* and on 12-h light-dark cycle (light on at 7:00). *C57BL/6J*  
29 mice were obtained from local EMBL Rome colonies. The following transgenic mice lines  
30 were used: *Thy1::EGFP-M* (1) (Jackson Laboratory stock 007788) and *Rosa26-CAG::loxP-*  
31 *STOP-loxP-tdTomatoWPRE* (2) (Jackson Laboratory stock 007905), CD11b-deficient mice  
32 (3) (*C3r* or *Itgam*) (Jackson Laboratory stock 003991), *Emx1::Cre* (4). *Thy1::EGFP* animals  
33 were bred with *C3r* mice to generate double transgenic mice. Animals homozygous for  
34 *Thy1::EGFP* and heterozygous for *C3r* were bred to get animals of the desired genotype.  
35 Heterozygote *C3r* animals were bred to obtain WT controls and KO animals. For all the  
36 experiments littermate WT and KO were used wherever possible. Both males and females  
37 were used indiscriminately. All experiments were performed in accordance 91 with EU  
38 Directive 2010/63/EU and under approval of the EMBL Animal Use Committee 392 and  
39 Italian Ministry of Health License 541/2015-PR to C.G. The fMRI experiments were  
40 conducted in accordance with EU 86/609/EEC, DL 116, January 1992 and the Guide for the  
41 Care and use of Laboratory Animals of the National Institutes of Health. All surgical  
42 procedures were performed under anesthesia.

### 43 *In vivo PSVue labelling*

44 The activated PSVue 550 was prepared according to manufacturer's instructions (Molecular  
45 Targeting Technologies) using Zinc Nitrate and diluted to 1mM using sterile water. For *in*  
46 *vivo* labelling of apoptotic cells, postnatal day 4 pups were anesthetized by placing on  
47 crushed ice for 2-3 mins. Animals were then placed on a custom stage and the head was  
48 illuminated with a fibre optic light source. 1µl of activated PSVue was injected into the  
49 lateral ventricles (2/5<sup>th</sup> of the distance from the lambda to eye) using a 32G Hamilton syringe  
50 and the syringe was left in place 20-30 secs after injection. The pups were placed under a  
51 warm lamp and returned to the dam after recovery. 24 hours after injection the pups were  
52 perfused intracardially with PBS and 4% PFA in the Phosphate buffer. The brains were post-  
53 fixed in 4% PFA overnight and transferred to 30% Sucrose for cryoprotection

54 ***Immunostaining***

55 For immunostaining of cryostat sections (40µm or 30; Leica Microsystems) were incubated  
56 with blocking buffer (1x PBS + 2% BSA + 0.3% Triton X-100) for 2 hours followed by  
57 overnight incubation at 4°C with primary antibodies diluted in blocking buffer. The following  
58 antibodies were used: Goat anti-Iba1, Wako 011-27991, 1:250, Rabbit anti-activated caspase-  
59 3, Cell Signaling Technologies, 1:500, Rabbit anti-Iba1, Wako 019-19741, 1:500, Mouse  
60 anti-NeuN, Millipore MAB377, 1:200. For spine density analysis, Thy1::EGFP labeled  
61 Vibratome sections (50µm; Leica Microsystems) were blocked and then incubated overnight  
62 at 4°C with primary antibody (Chicken anti-GFP, Aves Lab 1:500) diluted in blocking buffer.  
63 Following incubation with primary antibody the tissues were washed in PBS, blocked and  
64 incubated with fluorophore conjugated secondary antibodies (Life Technologies) for 2 hours  
65 at room temperature. The tissues were mounted with MOWIOL or Prolong (Life  
66 Technologies).

67 ***Electron microscopy and quantification of optic nerve***

68 Mice at postnatal day six, from five different litters, were deeply anesthetized with Avertin  
69 (400 mg/kg, i.p.; Sigma-Aldrich) and slowly (less than 1ml/min) perfused transcardially with  
70 1x PBS and then 4% paraformaldehyde plus 2.5% Glutaraldehyde in 0.1 M phosphate buffer  
71 (PB), pH 7.4. Eyes were promptly extracted and the part of optic nerves attached (preceding  
72 the optic chiasm) dissected and placed in post-fixation buffer overnight (4%  
73 paraformaldehyde plus 2.5% Glutaraldehyde in 0.1 M phosphate buffer, pH 7.4). Any nerves  
74 that showed signs of damage were discarded. Samples were then shipped to Electron  
75 Microscopy Core facility site in EMBL-Heidelberg, for imaging, in 0.1M PB solution  
76 containing 0.5x fixative and with no air to avoid oxidation. Samples were then prepared for  
77 imaging: with 1% OsO4/1.5% Potassium Ferrocyanide for 1h on ice, then with 1% OsO4 in  
78 Sodium Cacodylate buffer 0.1M pH 7.4 on ice followed by 10x rinse in water and then  
79 stained in with 1% aqueous solution of Uranyl Acetate overnight at 4°C. Samples were then  
80 dehydrated with increasing concentration of Ethanol and after 100% Ethanol they were  
81 infiltrated in 3:1, 1:1 and 3:1 acetone:resin for 2h each step, and left in 100% resin overnight  
82 rotating. Samples were embedded into molds the next morning. Durcupan embedding was  
83 carried out in a flat orientation within a sandwich of ACLAR® 33C Films (Electron  
84 Microscopy Science) for 72h at 60°C. The samples were then cut and remounted on EPON  
85 blocks for sectioning.

86 Sections 90 nm thick were collected in the middle region of the optic nerve extracted (by  
87 avoiding the damaged extremities) and post-stained for 3 min with lead citrate. Images were  
88 acquired on a JEOL JEM-2100 Plus electron microscope at 120 kV with the SHOTMEISTER  
89 (JEOL software) and then collected and shared with LLP Viewer software. Montages were  
90 taken at 1200x and 5000x magnification.

91 The regions of interest selected along the vertical midline, over the longer axes of optic  
92 nerves, were exported in Fiji with a fixed width of 5.8  $\mu\text{m}$  and axons were manually counted.  
93 Axons were identified as rounded white/light-grey objects surrounded by a darker border and  
94 no distinction was made among myelinated (very low percentage) and unmyelinated axons.  
95 The number of axons was then divided for the size of area exported (axons/unit area) and to  
96 obtain the total number of axons per optic nerve the axons/unit area was normalized for the  
97 whole area. The whole area of the optic nerves was manually drawn and measured in Fiji by  
98 carefully excluding surrounding immune cells and blood vessels.

## 99 ***Image Analysis***

### 100 **Spine density analysis**

101 For spine density analysis, immunostained *C3r KO; Thy1::EGFP* and control brain sections  
102 corresponding to prelimbic and cingulate cortices (Bregma: 1.78 to 1.34) were imaged on a  
103 TCS SP5 resonant scanner confocal microscope (Leica Microsystems) with a 63x/1.4 oil  
104 immersion objective at 48 nm lateral resolution and a z-step of 130 nm. Spine density  
105 quantitation was performed as described earlier (5). Briefly, images were deconvolved using  
106 Huygens Professional software (Number of iterations < 50, quality change threshold – 0.1,  
107 theoretical point spread function. Image J software (NIH) was used for semi-automatic  
108 quantification of spine density. 8-bit maximum intensity projections were used and only  
109 lateral spines were analyzed. Signal intensity was measured in the dendritic shaft and used for  
110 normalization across all datasets. Background signal was measured outside the dendritic shaft  
111 and 1.4 times the background signal was removed. Images were automatically thresholded  
112 using the Huang algorithm. The image was inverted and watershed algorithm was applied  
113 followed by clearing of the dendritic shaft and neck. Spine number subsequently analyzed  
114 using particle measurement, after sphericity ( $>0.3/1$ ) and size ( $>0.005\mu\text{m}^2$ ) thresholding to  
115 avoid false positives. Spine density was calculated by normalizing the number of spines to  
116 the length of the dendritic branch imaged. On average 7 dendritic branches and 780  $\mu\text{m}$  of

117 dendrite was analyzed per animal. Animals from ten different litters were used for spine  
118 density analysis.

### 119 **Quantification of pyknotic cells and microglial phagocytosis**

120 Quantification of pyknotic cells and microglial phagocytosis was analyzed on cortical tissues  
121 from postnatal day 5 mice. Stained presumptive cingulate and somatosensory cortical regions  
122 were imaged on an Ultraview Vox Spinning Disk Confocal (Perkin Elmer) equipped with an  
123 EMCCD Camera (Hamamatsu C9100-50). Initially, the entire slide was scanned at 20x and  
124 the region of interest was imaged at higher magnification 60x/1.4NA oil immersion objective  
125 with a z-resolution of 0.3 $\mu$ m. Similar imaging parameters were used for both wild-type and  
126 knock-out animals. All the analysis was carried out blind to the genotype and phenotype.  
127 Quantification of pyknotic cells was performed using Imaris 8.0 or Imaris Viewer (Oxford  
128 Instruments) by converting the files to native Imaris file format. Pyknotic nuclei were  
129 identified by their distinct bright, condensed nuclei. All the engulfment events were manually  
130 confirmed by going through the Z-stack. For quantification of microglial cells, only Iba1  
131 positive cells with their soma clearly visible in the field were included. On average 8 fields  
132 were analyzed per animal for each brain region. Pyknotic nuclei, phagocytic cups and  
133 microglial count were normalized to the volume of tissue used for quantification. Similar  
134 volumes were used for quantification of both wildtype and knock-out: ACC total volume:  
135 99.2x10<sup>6</sup>  $\mu$ m<sup>3</sup> vs 89.7x10<sup>6</sup>  $\mu$ m<sup>3</sup> (WT vs KO) and somatosensory cortex total volume: 86.9x10<sup>6</sup>  
136  $\mu$ m<sup>3</sup> vs 80.6x10<sup>6</sup>  $\mu$ m<sup>3</sup> (WT vs KO). Phagocytosis-Apoptosis index was calculated as follows =  
137 (proportion of pyknotic nuclei inside microglia)/(density of pyknotic nuclei \* density of  
138 microglia). Animals from eight different litters were used for this analysis.

139

140

### 141 **Quantification of Caspase3 cell density**

142 For quantitation of caspase-3 density in *C3r* knockout and control mice, immunostained  
143 postnatal day 5 brain sections were imaged on an Ultraview Vox Spinning Disk Confocal  
144 (Perkin Elmer) equipped with an EMCCD Camera (Hamamatsu C9100-50). Initially, the  
145 entire slide was scanned at 4x and regions of interest were imaged using 40x/1.3NA oil

146 immersion objective with a z-resolution of 0.5 $\mu$ m. Number of aCasp3+ cells were normalized  
147 to the volume of the tissue imaged.

#### 148 **Cortical thickness analysis**

149 For cell counting and cortical thickness measurements coronal sections of 30  $\mu$ m from  
150 postnatal day 120 mice were used. Animals from fourteen different litters were used for  
151 cortical thickness and cell count measurements. The sections were stained for NeuN and  
152 DAPI and imaged on an inverted fluorescence microscope (THUNDER Imaging System,  
153 Leica Microsystems) using 20x/0.8 NA objective. The analysis was performed using  
154 Fiji/ImageJ, each image was rotated properly to be straight. NeuN channel was used to  
155 visualize the white matter structure which was used to identify the reference point for the  
156 measurements. Coronal sections from 1.53 mm to 1.21 mm were used for ACC analysis. For  
157 measurement of ACC thickness, first, a 180 $^{\circ}$  line was drawn and then moved down until it  
158 touches the forceps minor of corpus callosum (fmi). The point in which the line touches the  
159 fmi for the first-time structure was used as a reference point. The ACC thickness was  
160 measured by drawing a 180-degree line from the reference point until the end of layer 1. Data  
161 reported is an average of 3-4 different coronal sections for each animal.

162 For somatosensory cortex analysis, coronal sections from -1.46 mm to -1.57 mm were used.  
163 The parameters to measure cortical thickness in somatosensory cortex was experimentally  
164 determined to perform the measures always in the S1 region. For measuring the thickness of  
165 Somatosensory cortex, as a first step, an 180 $^{\circ}$  line was drawn and then rotated at 45 degrees,  
166 this line was moved up until it touched for the first time the hippocampus. The point in which  
167 the 45-degree line intercepts the beginning of the cortex was used as a reference point from  
168 which the 60-degree line was drawn, if the measurement is performed on the right side, and  
169 120 degrees if on the left side. This line was extended until the end of the layer 1 and the  
170 thickness of the cortex was measured. Data reported is an average of 3-4 different coronal  
171 sections for each animal.

#### 172 ***Automated cell count using StarDist***

173 The images used for automated cell counting were obtained on an inverted fluorescence  
174 microscope (THUNDER Imaging System, Leica Microsystems) using 20x/0.8NA objective  
175 using Z-step of 0.85 $\mu$ m and a lateral resolution of 0.41 $\mu$ m. Image acquisition was controlled

176 using LAS X software. All the sections were imaged for NeuN and DAPI channels and  
177 similar imaging conditions were used for all the animals. The images were computationally  
178 cleared using Large Volume Computational Clearing algorithm (LVCC), a proprietary  
179 package of LAS X (Leica Microsystems) before proceeding with counting. LVCC processing  
180 helps in reducing the out of focus blurs and background signal.

181 StarDist is a deep supervised machine learning tool developed for automated cell prediction  
182 (6). The method is suited for objects with a star-convex shape. When training the StarDist  
183 model, the images in the training set are randomly split into training data (90%) and  
184 validation data (10%). The validation data is used during the StarDist training to monitor the  
185 progress of the training and to determine the best combination of parameters of probability  
186 threshold and overlap threshold that allows the best prediction in the validation data. StarDist  
187 was trained using the scripts available at [https://git.embl.de/grp-bio-it/ai4ia/-](https://git.embl.de/grp-bio-it/ai4ia/-/tree/master/stardist)  
188 [/tree/master/stardist](https://git.embl.de/grp-bio-it/ai4ia/-/tree/master/stardist). All the models were exported from StarDist using Tensorflow version  
189 1.14 and Tensorflow version 1.14.0 was used in Fiji/ImageJ as well. For each model  
190 developed the following parameters were determined

- 191 ● *Probability/Score Threshold* – Higher threshold results in fewer segmented objects,  
192 thus reducing chances of false positives.
- 193 ● *Overlap Threshold* – Higher threshold allows segmented objects to overlap  
194 substantially. Allows for segmentation of cells in a crowded field.

### 195 **Image annotations with QuPath and StarDist training**

196 QuPath v0.2.0-m11 software was chosen for the cell annotations used for all StarDist models.  
197 Detailed cell annotations were performed with brush modality only in NeuN channel but  
198 DAPI channel of the same image was used for confirmation. The StarDist approach learns  
199 how to predict cells using geometric parameters as the distance from the center of the cell to  
200 the border of the cell. For the StarDist algorithm, every single signal needs to be annotated  
201 even if it is from a cell that is partially visible because for example on the border of the  
202 image. Taking this into consideration, annotation was performed in a 512x512 pixels square  
203 positioned inside the 600x600 pixels image. Using this approach, it was possible to fully  
204 annotate borderline cells even if part of the cell body is going outside the 512x512 pixels  
205 square, this approach allows us to maintain the real geometric distance from the center to the  
206 border of the cell.

207 A pipeline outlining development of Stardist based image quantitation is described in **Figure**  
208 **S5A**. We started attempting using a pre-trained model ‘Versatile (fluorescent nuclei)’.  
209 However, we observed high levels of relative error (%). Then we switched to custom user-  
210 trained models. The training was performed using 10 NeuN channel images with 512x512  
211 pixel size from two brain regions: ACC and somatosensory cortex. After training with images  
212 from ACC (called ‘C cortex’ model) and somatosensory cortex (called ‘SS cortex’ model) we  
213 found that the model trained with images from somatosensory cortex (‘SS cortex’) performed  
214 best in automated counting in both ACC and somatosensory cortex regions. In some of the  
215 training Data Science Bowl (DSB) was included. DSB is a dataset with 37,333 manually  
216 annotated nuclei in 841 2D images from more than 30 experiments across different samples,  
217 cell lines, microscopy instruments, imaging conditions, operators, research facilities, and  
218 staining protocols. The annotations were manually made by a team of expert biologists (7).  
219 Inclusion of DSB pre-training data did not improve the performance of either ‘C cortex’ or  
220 ‘SS cortex’ model. Training the ‘SS cortex’ model with DAPI data did not improve the  
221 performance of the model. In fact, it resulted in poor performance of the ‘SS cortex’ model  
222 (relative error (%)  $4.01 \pm 0.30$  vs  $41.31 \pm 20.9$  without vs with DAPI) during validation of  
223 images from Somatosensory cortex. To improve the performance of the ‘SS cortex’ model  
224 and to eliminate any randomness that might contribute to the performance of the model, using  
225 the same training set used in the ‘SS cortex’ model, 10 different re-trainings were performed.  
226 In each training, 10 % of the images were randomly selected and included in the internal  
227 validation. Of these new ten re-trained models ‘SS cortex re-trained 5’ show a decrease of  
228 relative error (%) from  $4.01 \pm 0.30$  to  $3.18 \pm 0.37$  (‘SS cortex re-trained 5’ vs ‘SS cortex’).

229 *Absolute error* = |Number of cells predicted by StarDist – Number of cells obtained by  
230 average of 3 counts by manual method|

231 *Relative error in %* = (Absolute error / Number of cells obtained by average of 3 counts by  
232 manual method) \* 100

### 233 **Manual validation of all StarDist models**

234 For manual validation, images of 600x600 pixel from the NeuN channel five each from the  
235 ACC cortex and somatosensory cortex were used. For each image, manual counting was  
236 performed 3 times and an average of the three values was used as the final measure of the cell  
237 count and calculation of relative error (%). The StarDist model was applied to each image

238 and then the result of the predictions was quantified. For each prediction, the relative error  
239 (%) was calculated.

#### 240 **Application of the best StarDist model**

241 The best model 'SS cortex re-trained 5' was applied to the images using StarDist2D plugin in  
242 Fiji/ImageJ, entering manually the parameters of probability threshold and overlap threshold.  
243 The model was applied to a 2D z-section chosen with the following criteria: 1) section with  
244 the highest intensity; 2) section in which cells are well visible and in focus. In the chosen z-  
245 section the analysis was performed in a rectangle drawn with the following criteria: 1) the  
246 first dimension was fixed at 300 pixels; 2) the second dimension corresponds to measure of  
247 cortical thickness. The Probability/Score Threshold used was 0.45561 and the overlap  
248 threshold was set to 0.40000. All the predictions by StarDist were manually verified to  
249 remove any false positives or false negatives. The data presented is an average of two  
250 sections analyzed per animal.

#### 251 ***Retrograde labelling of Callosal projection neurons***

#### 252 **Stereotaxic surgery and retrograde labelling**

253 CTB back-labelling and quantitation was performed as described by De Leon Reyes et al.,  
254 2019 (8) with some modifications. Mice of age Postnatal day 30 were anesthetized with 4%  
255 Isoflurane and placed in a stereotactic frame (RWD Life Sciences); isoflurane in oxygen (1-  
256 2%) was administered to maintain anesthesia. The skin was incised and the skull surface was  
257 exposed. The skull was trepanated using a dental drill. Using a glass capillary (tip diameter –  
258 30um) 500nl of CTB 647 (0.5% in Phosphate-buffered Saline, Life Technologies) was  
259 pressure injected into the Corpus Callosum (Co-ordinates: AP =-1.4, ML =0.70, and DV =-  
260 1.70 with an angle of 18<sup>0</sup>) at the rate of 50nl/per minute. The capillary was left in position for  
261 10-15 minutes after injection and then retracted. Animals received a Carprofen (Rymadil 5  
262 mg/kg, subcutaneous injection) as surgical analgesia. After allowing CTB migration for 72 h  
263 post-surgery mice were transcardially perfused with 4% PFA in 0.1M Phosphate buffer.

#### 264 **Imaging and analysis of CTB labelled cells**

265 Brains were removed from the skull and left to postfix overnight in 4% PFA at 4°C. Brains  
266 were cryoprotected with 30% sucrose and 40 µm coronal sections cut on a cryostat. For



267 quantitative analyses, two coronal sections per animal corresponding to -1.23 to -1.5mm AP  
268 were used. Images were acquired with an inverted fluorescence microscope (THUNDER  
269 Imaging System, Leica Microsystems) using 20x/0.8 NA objective equipped with an sCMOS  
270 camera. Image acquisition was controlled with LAS X software (Leica Microsystems).  
271 Images were acquired using 1µm optical thickness and the same imaging parameters were  
272 used for all the animals. Mosaics were generated by merging several individual frames, using  
273 a spatial overlap of 15% also performed with LAS X software. Quantification of CTB+ cells  
274 was performed manually using ImageJ on images from z stacks using DAPI and CTB  
275 staining. Analysis was performed in a blinded fashion. S1 and S2 regions of the  
276 somatosensory cortex were demarcated by the pattern of CTB back-labeling. Fifty nuclei  
277 were randomly selected using the ‘multi-point tool’ in layer 4 of the S1 and S2 regions. Then  
278 the images were switched to CTB channel and proportion of CTB+ cells among the ‘selected’  
279 nuclei was calculated by going through images in z-stack. Data are presented as the  
280 percentage of CTB+ cells out of selected DAPI+ cells. Animals from four different litters  
281 were used.

## 282 *In vitro electrophysiology*

283 Acute hippocampal slices were prepared as in Basilico et al. 2019 (9). Briefly, *C3r* KO/*C3r*  
284 KO; *Thyl::EGFP* male mice at P40 were decapitated under halothane anesthesia and whole  
285 brains were rapidly immersed for 5-10 min in chilled artificial cerebrospinal fluid (ACSF:  
286 125 mM NaCl, 2.5 mM HCl, 2 mM CaCl<sub>2</sub>, 1 mM MgCl<sub>2</sub>, 1.25 mM NaH<sub>2</sub>PO<sub>4</sub>, 1.1 mM  
287 glucose, 2.6 mM NaHCO<sub>3</sub>) with 250 mM glycerol. Brains were sectioned into 250-µm-thick  
288 slices at 4 °C, using a vibratome (DSK, Dosaka EM). Slices were placed in a chamber filled  
289 with oxygenated ACSF to recover for 1 hour at room temperature (RT). All recordings were  
290 performed at RT on slices submerged and perfused with ACSF with 10 µM bicuculline. CA1  
291 pyramidal neurons were visualized with an upright Axioscope microscope (Zeiss) and were  
292 patched in whole-cell configuration. Borosilicate glass micropipettes (3.5-4.5 MΩ) were  
293 filled with an intracellular solution (135 mM CsMetSO<sub>4</sub>, 10 mM HEPES, 2 mM MgATP, 0.3  
294 mM NaGTP, 2 mM Qx314 bromide, 2 mM MgCl<sub>2</sub>, 0.4 mM CaCl<sub>2</sub>, 5 mM BAPTA).  
295 Membrane currents were recorded with a patch-clamp amplifier (Axopatch 200A, Molecular  
296 Devices) and were filtered at 2 kHz, digitized (10 kHz) and acquired with Clampex 10  
297 software (Molecular Devices). To record sEPSCs, each neuron was clamped at -70 mV for 10  
298 minutes. Miniature EPSCs (mEPSCs) were recorded after 10 minutes of bath perfusion with

299 tetrodotoxin (TTX, 1  $\mu$ M). Recorded signals were low-pass filtered at 1 kHz and analyzed  
300 using Clampfit 10.4 software (Molecular Devices). 19-21 cells were recorded for sEPSCs and  
301 12-14 cells were recorded for mEPSCs. sEPSC were identified on the basis of a template  
302 created for each neuron using 50-70 single events for each trace. All events recognized  
303 through the template search function were visualized, identified and accepted by manual  
304 analysis. To record evoked EPSCs, bipolar theta micropipettes (filled with ACSF) were used  
305 for stimulation and placed in stratum radiatum near CA1 area over the Schaeffer-commissural  
306 afferent fibers. Input-output curves of eEPSCs were recorded by sequentially stimulating  
307 Schaeffer collateral fibers at different intensities (0.1, 0.5, 1, 3, 7 and 10 mA) using paired-  
308 pulse protocol (0.1 ms duration of the stimulus, 50 ms interval between two consecutive  
309 stimuli and 10 s interval of two pair of stimuli). The experiments were performed from 1 to 8  
310 hours after slicing. 19-26 cells were recorded for eEPSCs recordings. The recordings were  
311 carried out blind to animal genotype.

### 312 ***Resting state fMRI***

313 Resting state fMRI (rs-fMRI) experiments were performed as previously described (10–12).  
314 At the time of imaging, mice were between 19 and 42 weeks old (wild-type controls: N = 19,  
315 age  $30 \pm 7$  weeks; *C3r* knockout: N = 20, age  $28 \pm 6$  weeks, animals from 13 different litters).  
316 Briefly, mice were anesthetized with isoflurane (5% induction), intubated and artificially  
317 ventilated (2% maintenance). The left femoral artery was cannulated for continuous blood  
318 pressure monitoring and terminal arterial blood sampling. After surgery, isoflurane was  
319 discontinued and replaced with halothane (0.75%), and fMRI acquisitions commenced 45  
320 minutes after isoflurane cessation. Arterial Blood gases (pCO<sub>2</sub> and pO<sub>2</sub>), and fluctuations of  
321 cortical BOLD-fMRI signal-to-noise ratio (SNR) were measured at the end of functional  
322 fMRI acquisitions, and compared between groups in order to discard genotype-dependent  
323 physiological confounds and anesthesia sensitivity. Mean pCO<sub>2</sub> and O<sub>2</sub> levels recorded in  
324 wild-type controls ( $22 \pm 4$  and  $210 \pm 32$  mmHg) and *C3r* knockout ( $22 \pm 5$  and  $232 \pm 27$  mmHg)  
325 showed no significant differences (2-sample t-test). Body mass and SNR also showed no  
326 significant differences between wild-type controls ( $28.7 \pm 5$  gm and  $20.8 \pm 32$ ) and *C3r*  
327 knockout mice ( $28.7 \pm 4$  gm and  $22.1 \pm 32$ ), excluding possible confounds from anesthesia  
328 depth in our intergroup comparisons (13).

329 rsfMRI images were acquired with a 7.0-T MRI scanner (Bruker Biospin, Milan) as  
330 previously described (14), using a 72-mm birdcage transmit coil and a 4-channel solenoid

331 coil for signal reception. For each session, *in-vivo* anatomical images were acquired with a  
332 fast spin echo sequence (repetition time [TR] = 5500 ms, echo time [TE] = 60 ms, matrix 192  
333 × 192, field of view 2 × 2 cm, 24 coronal slices, slice thickness 500 μm). Co-centered single-  
334 shot BOLD rsfMRI time series were acquired using an echo planar imaging (EPI) sequence  
335 with the following parameters: TR/TE = 1000/15 ms, flip angle 30°, matrix 100 × 100, field  
336 of view 2.3 × 2.3 cm, 18 coronal slices, slice thickness 600 μm for 1920 volumes.

### 337 ***Functional Connectivity Analyses***

338 fMRI images were preprocessed as previously described (11, 12). The first 120 volumes were  
339 discarded to allow for T1 and gradient thermal equilibration. Data were despiked, motion-  
340 corrected, and spatially registered to an in-house common reference template. Motion traces  
341 from head realignment parameters (3 translations + 3 rotations) and the mean ventricular  
342 signal were regressed out as nuisance covariates. Denoised data was bandpass-filtered  
343 between 0.01-0.1 Hz and spatially smoothed with a full-width at half-maximum kernel of 0.6  
344 mm.

345 In order to perform an unbiased investigation of brain regions exhibiting genotype-dependent  
346 connectivity alterations, we mapped Local Functional Connectivity (LFC) at the voxel-level.  
347 LFC strength here is defined as the averaged Pearson's correlation of a voxel's time-course to  
348 a subset of voxels in the local vicinity. We limited this vicinity to connections within a 6-  
349 voxel radius, and correlation coefficients were transformed to z-scores using the r-to-z  
350 Fisher's transform before averaging, and then back-transformed into correlation mean scores  
351 (13). Genotype-dependent LFC differences were assessed at the voxel-level using a 2-tailed  
352 Student's t-test and cluster corrected with the family-wise error method (FWER) as  
353 implemented by FSL ( $|t| > 2$ ,  $p < 0.05$ ). Quantifications of LFC at the regional level were  
354 done by averaging each subject's LFC scores within a region-of-interest (ROI) in the  
355 Prefrontal Cortex (PFC) and the mediodorsal Thalamus (TH), and inter-group differences were  
356 computed using a 2-tailed Student's t-test ( $|t| > 2$ ,  $p < 0.05$ ) and corrected for multiple  
357 comparisons with the Benjamini-Hochberg procedure of False Discovery Rate (FDR)  $q =$   
358 0.05. Intergroup differences in the extension and intensity of long-range rsfMRI correlation  
359 networks were mapped using a seed-based approach as previously described (15). Genotype-  
360 dependent functional connectivity differences to the prefrontal cortex were assessed at the  
361 voxel-level using a 2-tailed Student's t-test and cluster corrected with the family-wise error  
362 method (FWER) as implemented by FSL ( $|t| > 2$ ,  $p < 0.05$ ). Long-range connections were

363 assessed by computing interhemispheric homotopic connectivity (correlation coefficients)  
364 between mirroring cortical Regions of Interest (ROIs, see Figure 4D), or by probing the  
365 spatial extension of fMRI connectivity of the ACC using seed-based voxelwise mapping ( $|t| >$   
366  $2$ ,  $p < 0.05$ ) (14). Statistical significance of intergroup correlation strength in each homotopic  
367 ROI pair was assessed with a 2-tailed Student's t-test ( $|t| > 2$ ,  $p < 0.05$ ) and corrected for  
368 multiple comparisons with the Benjamini-Hochberg procedure of False Discovery Rate  
369 (FDR)  $q = 0.05$ .

### 370 *Statistical analysis*

371 Statistical analysis was performed using either Graphpad 5.0 or Sigmaplot. Plots were  
372 obtained with GraphPad Prism 5.0. Each data point refers to an individual animal. The data  
373 are presented as mean $\pm$  SEM. Spine density analysis, retrograde labelling, quantification of  
374 apoptotic cells, cortical thickness and cell counts were compared using two-way ANOVA  
375 with Tukey's multiple comparison. Axon density, total axon in optic nerve, quantification of  
376 microglial engulfment of PSVue and caspase-3 labelled cells were performed with two-tailed  
377 Student's t-test or Mann-Whitney test. rs-fMRI data was analyzed by unpaired t-test. We  
378 used a 95% CI. A  $p$  value of  $<0.05$  was set for rejecting the null hypothesis.

379

380

381

382

383

384

385

386

387

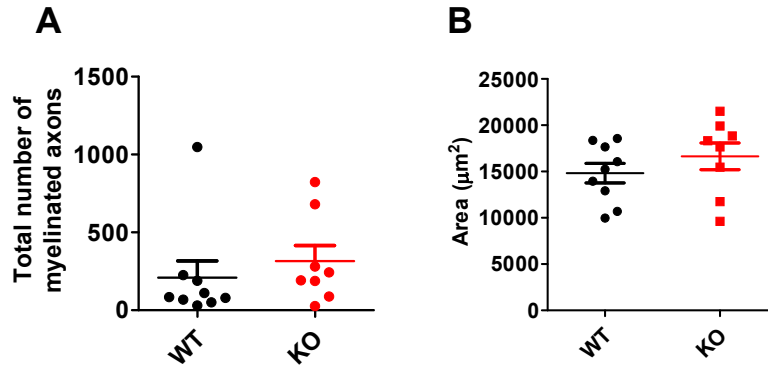

**Figure S1**

389

390 **Figure S1. Deficient retinal ganglion cell axonal pruning in *C3r* knockout mice.** (A) No  
 391 difference in the number of myelinated axons were seen between *C3r* knockout and control  
 392 littermates (unpaired t-test,  $p = 0.485$ ). (B) A small, non-significant increase in the area of the  
 393 optic nerve was observed in *C3r* knockout mice (unpaired t-test,  $p = 0.322$ ; mean  $\pm$  SEM, \*  $p$   
 394  $< 0.05$ , \*\*  $p < 0.01$ ).

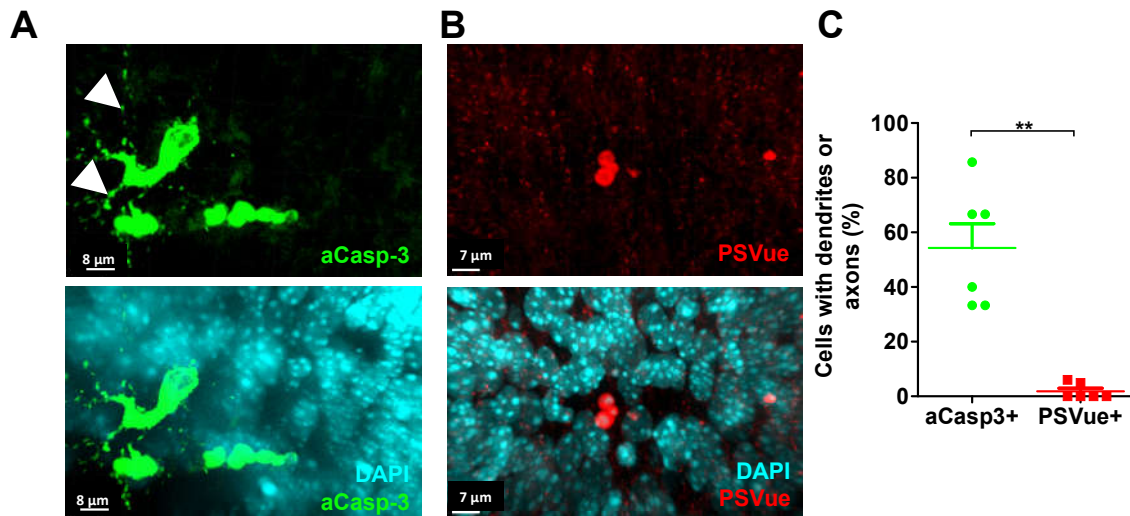

**Figure S2**

**Figure S2. Microglia phagocytose apoptotic neurons in early postnatal cortex.** (A) Activated caspase-3 positive cells (aCasp3+) often exhibit a clear neuronal morphology with blebs of dendrites and axons. (B) Unlike aCasp3+ cells, PSVue+ cells do not exhibit clear neuronal morphology. (C) Quantitation of aCasp3+ and Phosphatidylserine exposing PSVue+ cells with dendritic branches visible (Mann-Whitney Test,  $p = 0.004$ ; mean  $\pm$  SEM, \*  $p < 0.05$ , \*\*  $p < 0.01$ ).

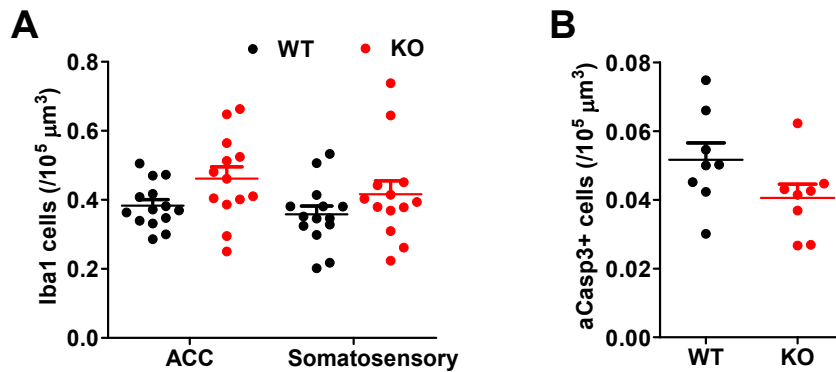

**Figure S3**

**Figure S3. Deficient neuronal elimination in *C3r* knockout mice.** (A) Marginal increase in the density of microglia is seen in *C3r* knockout mice (two-way ANOVA with Tukey's post hoc test – main effect of region:  $F[1, 50] = 1.46$ ,  $p = 0.232$ ; main effect of genotype:  $F[1, 50] = 5.44$ ,  $p = 0.024$ ; region x genotype interaction:  $F[1, 50] = 0.122$ ,  $p = 0.728$ ). (B) Quantification of apoptosis initiation by aCasp3 staining revealed no differences between control and *C3r* knockout mice (unpaired t-test,  $p = 0.102$ )

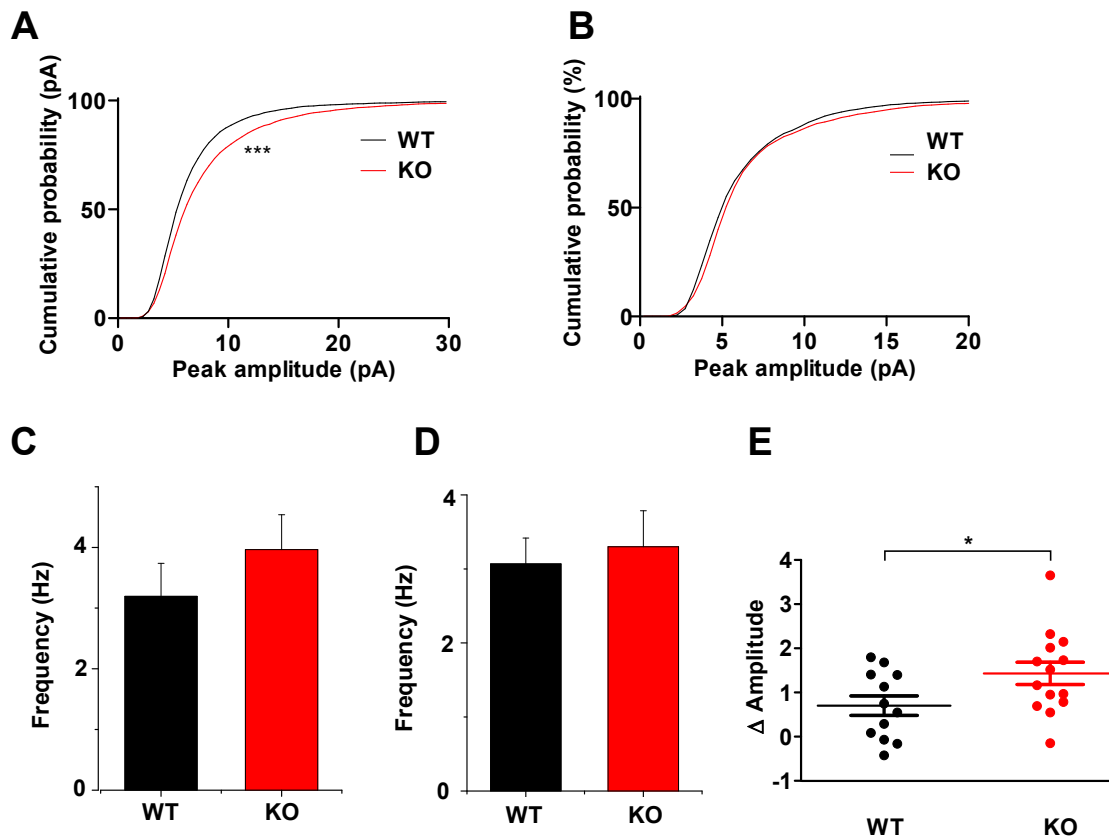

**Figure S4**

**Figure S4. Increased synaptic connectivity in *C3r* knockout mice.** (A) *C3r* knockout mice show rightward shift in amplitude of sEPSCs compared to wild-type littermates (Kolmogorov-Smirnov test,  $p < 0.001$ ). (B) No difference in the amplitude of mEPSCs were detected between the two genotypes (Kolmogorov-Smirnov test,  $p = 0.0597$ ). (C) *C3r* knockout mice show no difference in sEPSC frequency compared to wild-type littermates (unpaired t-test,  $p = 0.34$ ). (D) No difference in frequency of mEPSC were detected between the two genotypes (unpaired t-test,  $p = 0.701$ ). (E) Mild increase in  $\Delta$  amplitude (sEPSC-mEPSC) in *C3r* knockout mice (unpaired t-test  $p = 0.042$ ; mean  $\pm$  SEM. \*  $p < 0.05$ , \*\*  $p < 0.01$ , \*\*\*  $p < 0.001$ ).



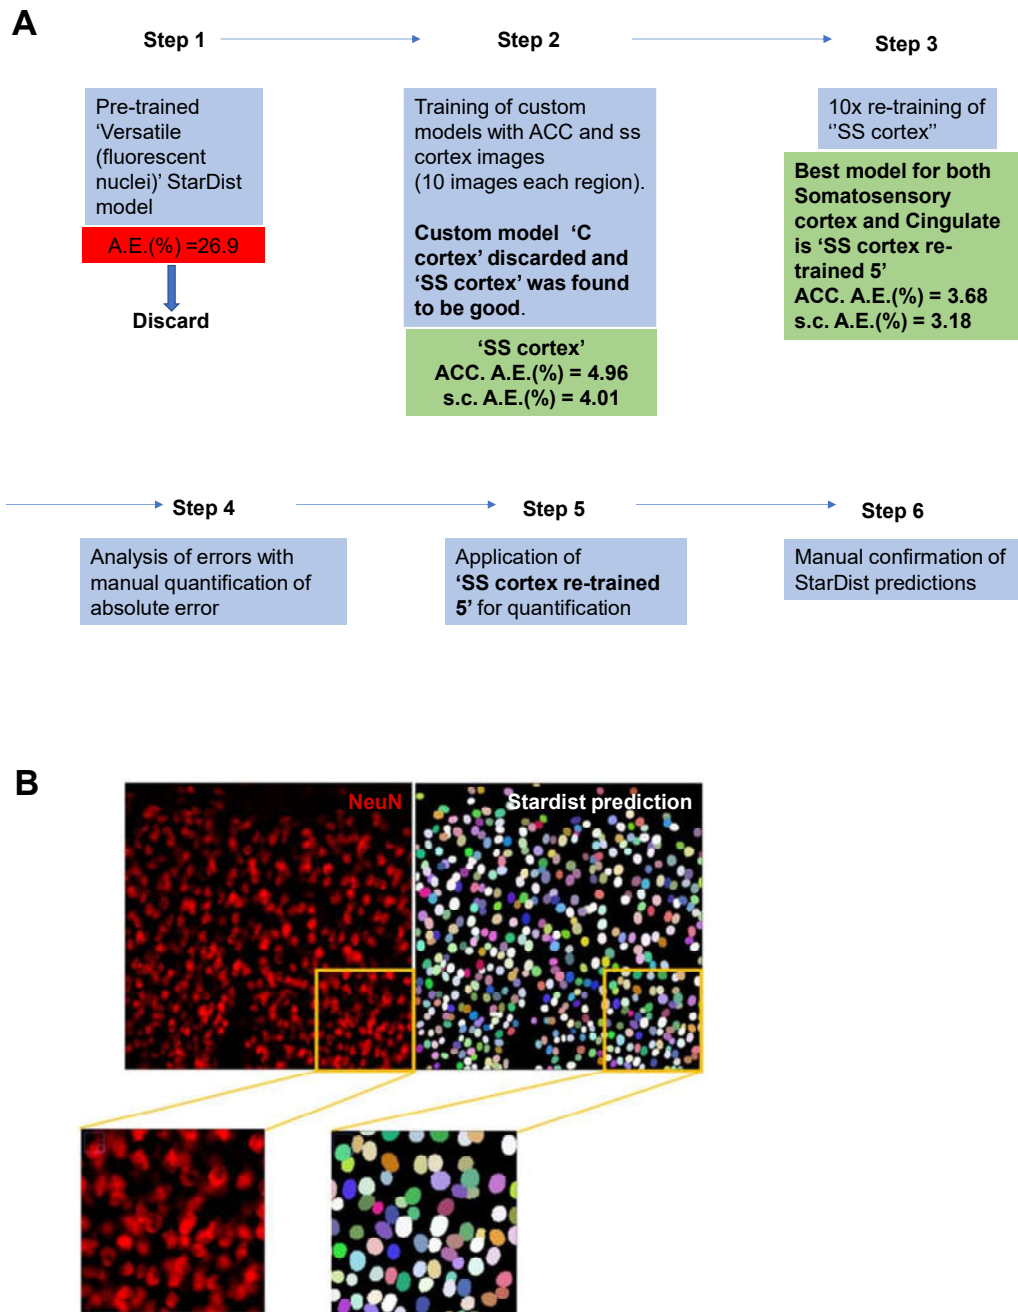

**Figure S5**

**Figure S5. Development and validation of automated quantification of neurons using *Stardist*.** (A) Flow chart depicting the development and validation of *Stardist* models for automated quantification of fluorescently labelled NeuN positive cells. (B) Example of a *Stardist* prediction using 'SS cortex re-trained 5' model. All the quantifications from *Stardist* predictions were manually verified for eliminating false positives and false negatives.

## References

1. G. Feng, *et al.*, Imaging neuronal subsets in transgenic mice expressing multiple spectral variants of GFP. *Neuron* **28**, 41–51 (2000).
2. L. Madisen, *et al.*, A robust and high-throughput Cre reporting and characterization system for the whole mouse brain. *Nat. Neurosci.* **13**, 133–140 (2010).
3. A. Coxon, *et al.*, A novel role for the beta 2 integrin CD11b/CD18 in neutrophil apoptosis: a homeostatic mechanism in inflammation. *Immunity* **5**, 653–666 (1996).
4. T. Iwasato, *et al.*, Cortex-restricted disruption of NMDAR1 impairs neuronal patterns in the barrel cortex. *Nature* **406**, 726–731 (2000).
5. L. Weinhard, *et al.*, Sexual dimorphism of microglia and synapses during mouse postnatal development. *Dev. Neurobiol.* **78**, 618–626 (2018).
6. U. Schmidt, M. Weigert, C. Broaddus, G. Myers, “Cell detection with star-convex polygons” in *Medical Image Computing and Computer Assisted Intervention – MICCAI 2018*, Lecture notes in computer science., (Springer International Publishing, 2018), pp. 265–273.
7. J. C. Caicedo, *et al.*, Nucleus segmentation across imaging experiments: the 2018 Data Science Bowl. *Nat. Methods* **16**, 1247–1253 (2019).
8. N. S. De León Reyes, *et al.*, Transient callosal projections of L4 neurons are eliminated for the acquisition of local connectivity. *Nat. Commun.* **10**, 4549 (2019).
9. B. Basilico, *et al.*, Microglia shape presynaptic properties at developing glutamatergic synapses. *Glia* **67**, 53–67 (2019).
10. L. Ferrari, *et al.*, A robust experimental protocol for pharmacological fMRI in rats and mice. *J. Neurosci. Methods* **204**, 9–18 (2012).
11. D. Gutierrez-Barragan, M. A. Basson, S. Panzeri, A. Gozzi, Infraslow State Fluctuations Govern Spontaneous fMRI Network Dynamics. *Curr. Biol.* **29**, 2295–2306.e5 (2019).
12. M. Pagani, *et al.*, Deletion of Autism Risk Gene Shank3 Disrupts Prefrontal Connectivity. *J. Neurosci.* **39**, 5299–5310 (2019).
13. A. Liska, *et al.*, Homozygous Loss of Autism-Risk Gene CNTNAP2 Results in Reduced Local and Long-Range Prefrontal Functional Connectivity. *Cereb. Cortex* **28**, 1141–1153 (2018).
14. A. Liska, A. Galbusera, A. J. Schwarz, A. Gozzi, Functional connectivity hubs of the mouse brain. *Neuroimage* **115**, 281–291 (2015).
15. F. Sforazzini, *et al.*, Altered functional connectivity networks in acallosal and socially impaired BTBR mice. *Brain Struct. Funct.* **221**, 941–954 (2016).
